# Supplementary material for: Realizing luminescent and dielectric abilitiesvialattice-disturbance with Eu3+/Ti4+co-substitutions in Ba2NaNb5O15ceramics
Source: Royal Society of Chemistry journal article supplement (doi:10.1039/d1qm00177a), 2021-01-01
Supplement: d1qm00177a2.pdf [file d1qm00177a2.pdf]

## Supplementary information

### Realizing luminescent and dielectric abilities via lattice-disturbance

### with $\text{Eu}^{3+}/\text{Ti}^{4+}$ co-substitutions in $\text{Ba}_2\text{NaNb}_5\text{O}_{15}$ ceramics

Donglei Wei, Hyo Jin Seo\*

Department of Physics, Pukyong National University, Daeyeon 3-Dong 599-1, Namgu, Busan 608-737, Republic of Korea

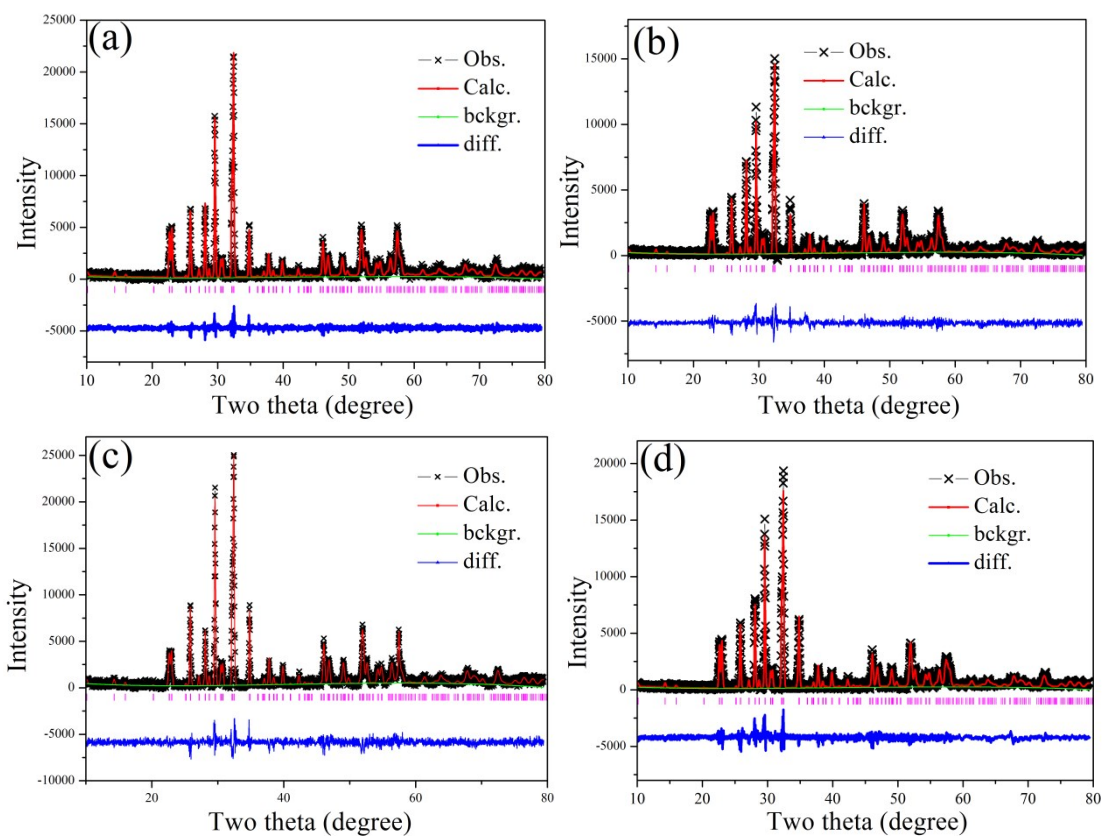

---

\* Corresponding author, E-mail address: [hjseo@pknu.ac.kr](mailto:hjseo@pknu.ac.kr) (H. Seo)

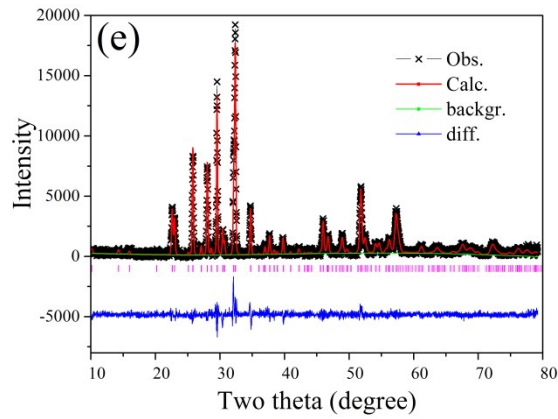

**Figure-S1** the representative structural Rietveld refinement of  $\text{Ba}_{2-x}\text{Eu}_x\text{NaNb}_5\text{O}_{15}$  ( $x=0.01$ ) (a),  $\text{Ba}_{2-x}\text{Eu}_x\text{NaNb}_5\text{O}_{15}$  ( $x=0.1$ ) (b),  $\text{Ba}_{2-x}\text{Eu}_x\text{NaNb}_{5-y}\text{Ti}_y\text{O}_{15}$  ( $x=y=0.1$ ) (c), and  $\text{Ba}_{2-x}\text{Eu}_x\text{NaNb}_{5-y}\text{Ti}_y\text{O}_{15}$  ( $x=y=0.3$ ) (d, f)  $\text{Ba}_{2-x}\text{Eu}_x\text{NaNb}_{5-y}\text{Ti}_y\text{O}_{15}$  ( $x=y=0.2$ ) (e) at 300 K.

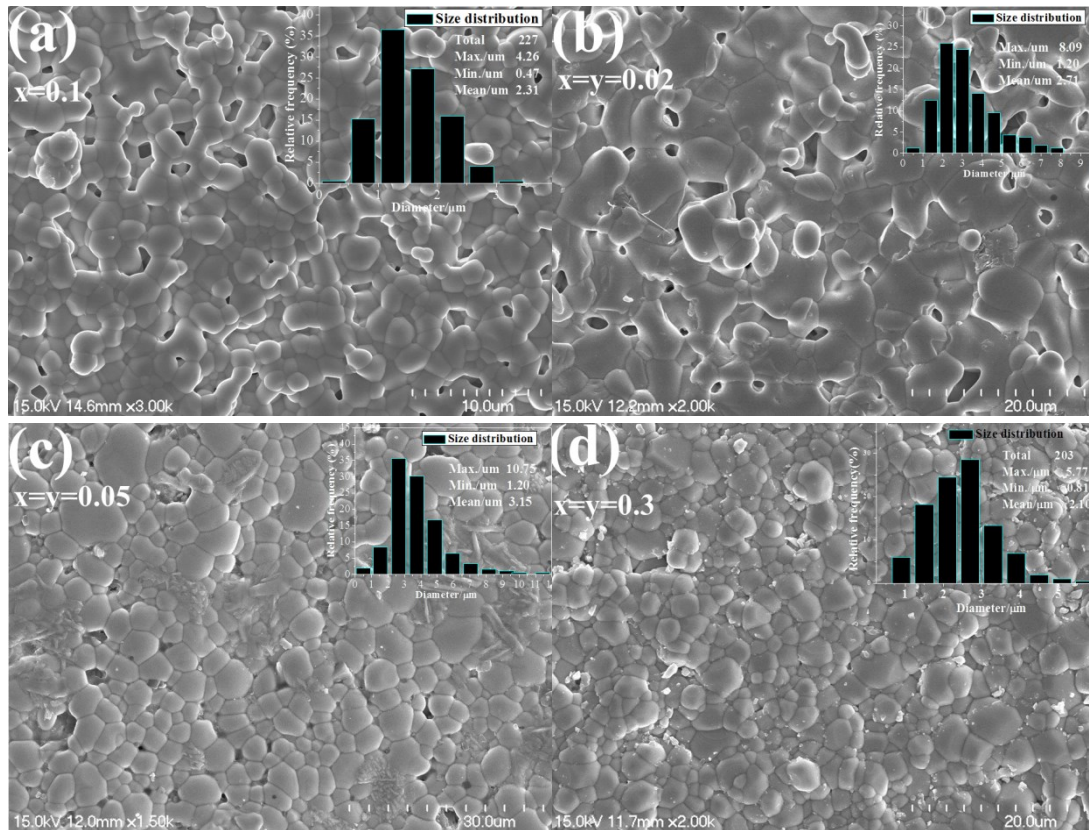

**Figure S-2** the SEM images of  $\text{Ba}_{2-x}\text{Eu}_x\text{NaNb}_5\text{O}_{15}$  ( $x=0.1$ ) (a),  $\text{Ba}_{2-x}\text{Eu}_x\text{NaNb}_{5-y}\text{Ti}_y\text{O}_{15}$  ( $x=y=0.02$ ) (b),  $\text{Ba}_{2-x}\text{Eu}_x\text{NaNb}_{5-y}\text{Ti}_y\text{O}_{15}$  ( $x=y=0.05$ ) (c), and  $\text{Ba}_{2-x}\text{Eu}_x\text{NaNb}_{5-y}\text{Ti}_y\text{O}_{15}$  ( $x=y=0.3$ ) (d).

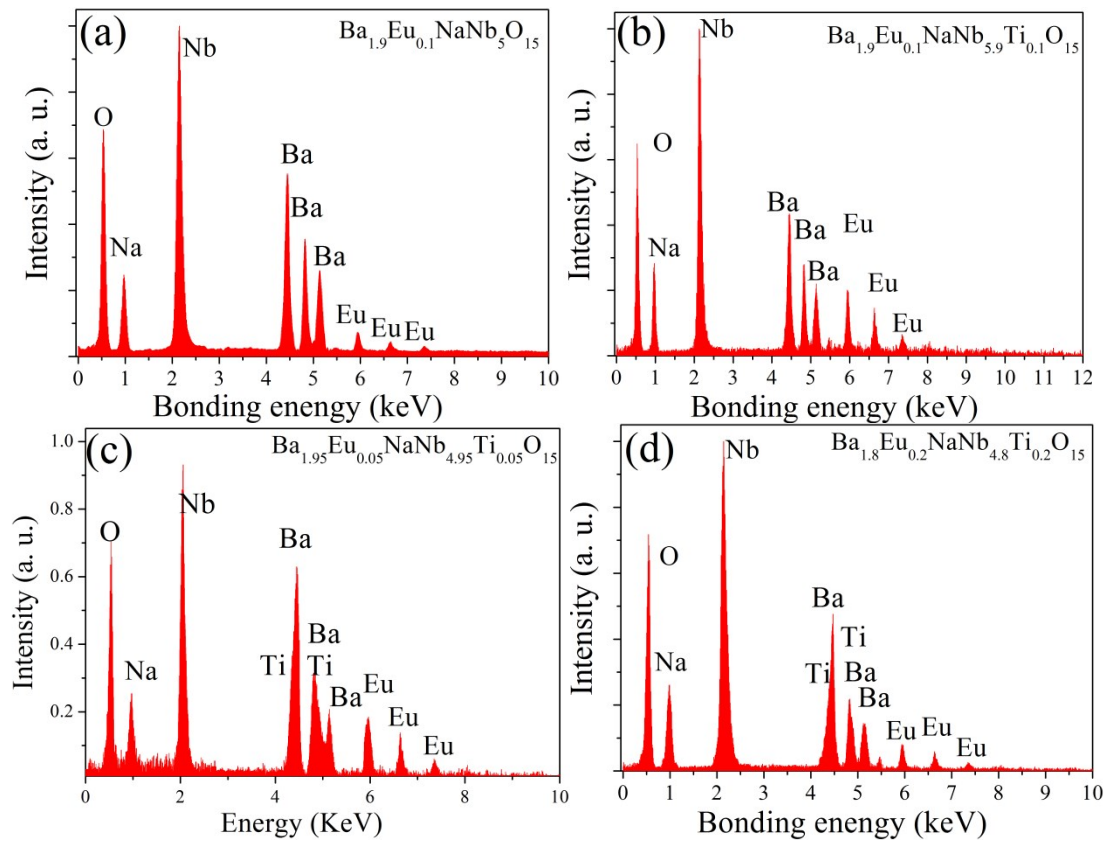

**Figure S-3** the EDS spectra of Ba<sub>2-x</sub>Eu<sub>x</sub>NaNb<sub>5</sub>O<sub>15</sub> ( $x=0.01$ ) (a), Ba<sub>2-x</sub>Eu<sub>x</sub>NaNb<sub>5</sub>O<sub>15</sub> ( $x=0.1$ ) (b), Ba<sub>2-x</sub>Eu<sub>x</sub>NaNb<sub>5-y</sub>Ti<sub>y</sub>O<sub>15</sub> ( $x=y=0.1$ ) (c), and Ba<sub>2-x</sub>Eu<sub>x</sub>NaNb<sub>5-y</sub>Ti<sub>y</sub>O<sub>15</sub> ( $x=y=0.3$ ) (d).

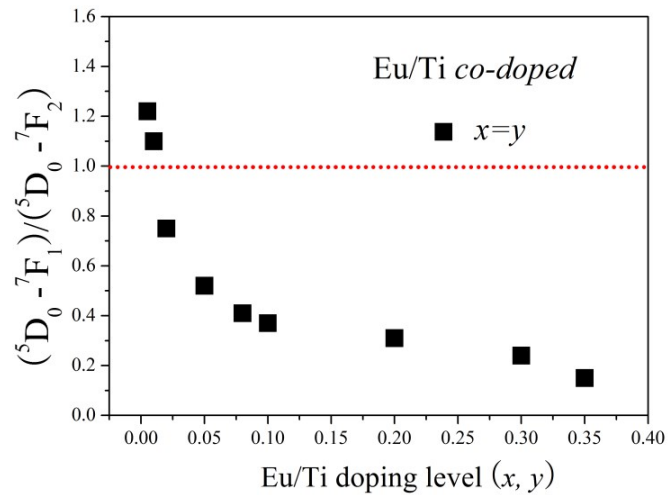

**Figure S-4** The emission intensity ratio of  $(^5D_0 \rightarrow ^7F_1)/(^5D_0 \rightarrow ^7F_2)$  of Ba<sub>2-x</sub>Eu<sub>x</sub>NaNb<sub>5-y</sub>Ti<sub>y</sub>O<sub>15</sub> ( $x = y = 0.005 - 0.35$ ).

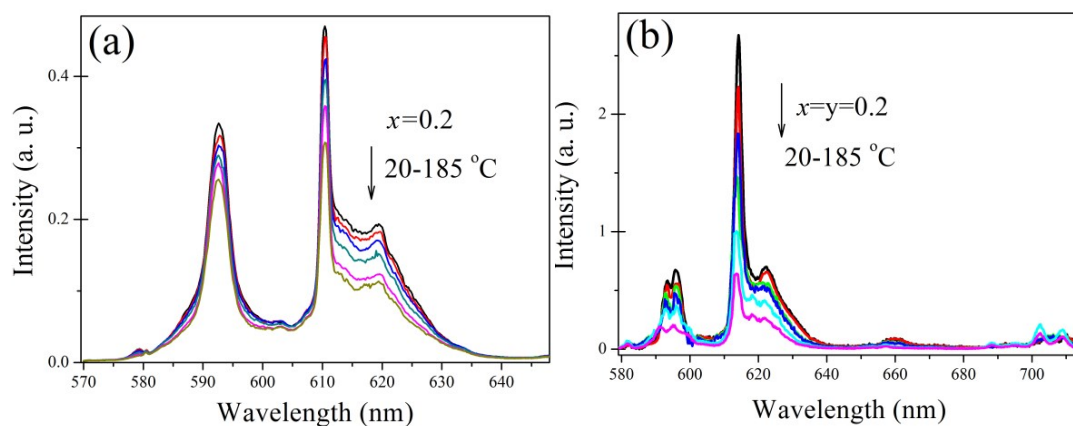

**Figure S-5** the experimental luminescence spectra of  $\text{Ba}_{2-x}\text{Eu}_x\text{NaNb}_5\text{O}_{15}$  ( $x=0.2$ ),  $\text{Ba}_{2-x}\text{Eu}_x\text{NaNb}_{5-y}\text{Ti}_y\text{O}_{15}$  ( $x=y=0.2$ ) at different temperature.

**Table S1** The refined structural parameters of  $\text{Ba}_{2-x}\text{Eu}_x\text{NaNb}_{5-y}\text{Ti}_y\text{O}_{15}$  ( $x=y=0.2$ ) from the Rietveld refinement using X-ray powder diffraction data taken at room temperature.

| formula                 | $\text{Ba}_{1.8}\text{Eu}_{0.2}\text{NaNb}_{4.8}\text{Ti}_{0.2}\text{O}_{15}$ |
|-------------------------|-------------------------------------------------------------------------------|
| radiation               | Cu-K $\alpha$                                                                 |
| $2\theta$ range(degree) | 10-80                                                                         |
| symmetry                | tetragonal                                                                    |
| space group#            | P4bm (100)                                                                    |
| $a/\text{\AA}$          | 12.5361(6)                                                                    |
| $b/\text{\AA}$          | 12.5361(6)                                                                    |
| $c/\text{\AA}$          | 4.0039(3)                                                                     |
| $\alpha/^\circ$         | 90.000                                                                        |
| $\beta/^\circ$          | 90.000                                                                        |
| $\gamma/^\circ$         | 90.000                                                                        |
| Z                       | 2                                                                             |
| $R_p$                   | 0.4552                                                                        |
| $R_{wp}$                | 0.5657                                                                        |
| $\chi^2$                | 204.4                                                                         |
| V                       | 629.26 (7) $\text{\AA}^3$                                                     |

**Table S2** The refined structural parameters of  $\text{Ba}_{2-x}\text{Eu}_x\text{NaNb}_{5-y}\text{Ti}_y\text{O}_{15}$  ( $x=y=0.2$ ) from the

Rietveld refinement using X-ray powder diffraction data taken at room temperature.

| Atom     | Wyckoff | x/a        | y/b        | z/c       | Occupancy | U [ $\text{\AA}^2$ ] |
|----------|---------|------------|------------|-----------|-----------|----------------------|
| (Ba/Eu)1 | 2a      | 0          | 0          | 0.863(13) | 0.44      | 0.068(7)             |
| Na1      | 2a      | 0          | 0          | 0.673(23) | 0.56      | 0.0526(35)           |
| (Ba/Eu)2 | 4c      | 0.1879(11) | 0.6879(11) | 0.826(10) | 0.78      | 0.082(7)             |
| Na2      | 4c      | -0.602(6)  | -0.102(6)  | 4.013(27) | 0.22      | 0.0035               |
| (Nb/Ti)1 | 2b      | 0          | 1/2        | 0.105(8)  |           | 0.0055               |
| (Nb/Ti)2 | 8d      | 0.0647(9)  | 0.2165(9)  | 0.143(7)  |           | 0.0052               |
| O1       | 8d      | 0.34450    | 0.00690    | 0.97400   |           | 0.032(29)            |
| O2       | 8d      | 0.14190    | 0.07130    | 0.97700   |           | 0.0003               |
| O3       | 4c      | 0.28260    | 0.78260    | 0.97400   |           | 0.0003               |
| O4       | 2b      | 0          | 1/2        | 0.48300   |           | 0.0003               |
| O5       | 8d      | 0.29140    | 0.42240    | 0.47400   |           | 0.0003               |
